# Supplementary material for: Polyphenol-Rich Extracts from Cotoneaster Leaves Inhibit Pro-Inflammatory Enzymes and Protect Human Plasma Components against Oxidative Stress In Vitro
Source: PubMed Central journal article supplement (PMC6222437; doi:10.3390/molecules23102472), 2018-09-26
Supplement: molecules-23-02472-s001.pdf [file molecules-23-02472-s001.pdf]

## Supplementary Materials:

# Polyphenol-Rich Extracts from *Cotoneaster* Leaves Inhibit Pro-Inflammatory Enzymes and Protect Human Plasma Components Against Oxidative Stress *in vitro*

Agnieszka Kicel, Joanna Kolodziejczyk-Czepas, Aleksandra Owczarek, Anna Marchelak, Malgorzata Sopinska, Pawel Ciszewski, Pawel Nowak, Monika A. Olszewska

## Results

### *Qualitative UHPLC-PDA-ESI-MS<sup>3</sup> profiling of Cotoneaster leaf phenolics*

The qualitative UHPLC-PDA-ESI-MS<sup>3</sup> survey on the *Cotoneaster* leaf extracts revealed the presence of over forty phenolic compounds (Figure 1, Table S1), that were divided into three main groups such as phenolic acids and related quinic acid pseudodepsides, flavonoids, and flavan-3-ol derivatives including procyanidins.

In the group of quinic acid mono- and diesters containing in their structure caffeic and *p*-coumaroyl moieties (3, 4, 6, 7, 9, 12, 13, 17, 21, 42 and 46), compounds 3, 6, 9, 13, 42 and 46 were identified for the first time in the *Cotoneaster* species. Compound 6 was proposed to be a caffeic acid derivative, because its [M-H]<sup>-</sup> ion at *m/z* 451 yielded the MS<sup>2</sup> peak at *m/z* 179, typical of caffeic acid moiety. Compounds 9, 13, 42 and 46, eluting after chlorogenic acid (7) displayed the parent [M-H]<sup>-</sup> ions at *m/z* 515, suggesting that all four analytes were dicaffeoylquinic acids. In the case of compounds 9 and 13, despite the occurrence of some MS<sup>2</sup> fragments characteristic for dicaffeoylquinic acids, their MS fragmentation pattern was not characteristic enough to assign to any particular structure [1]. On the other hand, the MS<sup>2</sup> base peak of 42 and 46 at *m/z* 353, produced by the loss of a caffeoyl moiety [M-H-caffeoyl]<sup>-</sup>, and its subsequent fragmentation evaluated by the hierarchical key [1], allowed for identification of compounds 45 and 46 as 3,5- and 4,5-*O*-dicaffeoylquinic acids, respectively. The peak 3, also displaying the parent [M-H]<sup>-</sup> ion at *m/z* 515, was eluted much earlier than those of dicaffeoylquinic acids (9, 13, 42, 46) and chlorogenic acid (7). In addition to the fragments characteristic of monocaffeoylquinic acids, the MS<sup>2</sup> spectrum of this compound yielded fragments at *m/z* 353 ([M-H-162]<sup>-</sup>, loss of a hexose residue) and 341 ([M-H-174]<sup>-</sup>, loss of a quinic acid moiety). This fragmentation pattern pointed to a glycosylated monocaffeoylquinic acid, which might correspond to 1 or 5-*O*-caffeoylquinic acid hexoside [1]. The fact, that 5-*O*-caffeoylquinic acid (chlorogenic acid) was the major isomer in the tested extracts, permitted tentative identification of compound 3 as 5-*O*-caffeoylquinic acid hexoside.

Compounds 1, 2 and 10, detected only in DEF fractions were identified by comparison with reference standards and literature data [2] as protocatechuic, *p*-hydroxybenzoic and caffeic acids.

Among flavan-3-ols and procyanidins, seventeen individuals were found (5, 8, 11, 14-16, 18-20, 22-25, 27, 28, 35 and 36), among which (-)-epicatechin (18), procyanidins B-2 (15) and C-1 (23) clearly dominated, especially in the DEF and EAF fractions. In this group, seven analytes displaying parent ([M-H]<sup>-</sup> ions at *m/z* 577 (5, 11, 14, 19, 22, 24) or at *m/z* 1153 (20) and the relevant MS<sup>2</sup> and MS<sup>3</sup> fragments corresponding to B-type procyanidin di- and tetramers, respectively [3] were identified in the analyzed *Cotoneaster* species for the first time. Additionally, compound 36 was proposed to be proanthocyanidin derivative, because its parent [M-H]<sup>-</sup> ion at *m/z* 483 yielded the MS<sup>2</sup> fragment at *m/z* 289, characteristic for epicatechin.

Of the compounds classified as flavonoids (26, 30-34, 38-41, 43-45 and 47), all analytes were found to be quercetin or kaempferol mono- and diglycosides. Compounds 26, 32, 33, 34, 41 and 47 were identified with authentic standards as quercetin 3-*O*-β-(2''-*O*-β-xylosyl)-galactoside, hyperoside, rutin, isoquercitrin, quercitrin, and quercetin, respectively. Among three compounds identified in the

*Cotoneaster* genus for the first time, **38** with the parent  $[M-H]^-$  ion at  $m/z$  433 was suggested to be quercetin pentoside, while compound **39** with the  $[M-H]^-$  ion at  $m/z$  447 was classified as kaempferol hexoside. Compound **45** with  $[M-H]^-$  ion at  $m/z$  593 was tentatively characterized as quercetin dirhamnoside.

## References

1. Clifford, M.N.; Knight, S.; Kuhnert, N. Discriminating between the six isomers of dicaffeoylquinic acid by LC-MSn. *J. Agric. Food Chem.*, **2005**, *53*, 3821–3832.
2. Su, S.; Cui, W.; Zhou, W.; Duan, J. A.; Shang, E.; Tang, Y. Chemical fingerprinting and quantitative constituent analysis of Siwu decoction categorized formulae by UPLC-QTOF/MS/MS and HPLC-DAD. *Chin. Med.*, **2013**, *8*, 1-15.
3. Karar, M. G. E.; Kuhnert, N. UPLC-ESI-Q-TOF-MS/MS characterization of phenolics from *Crataegus monogyna* and *Crataegus laevigata* (Hawthorn) leaves, fruits and their herbal derived drops (Crataegutt Tropfen). *J. Chem. Biol. Ther.* **2015**, *1*, 1-23.

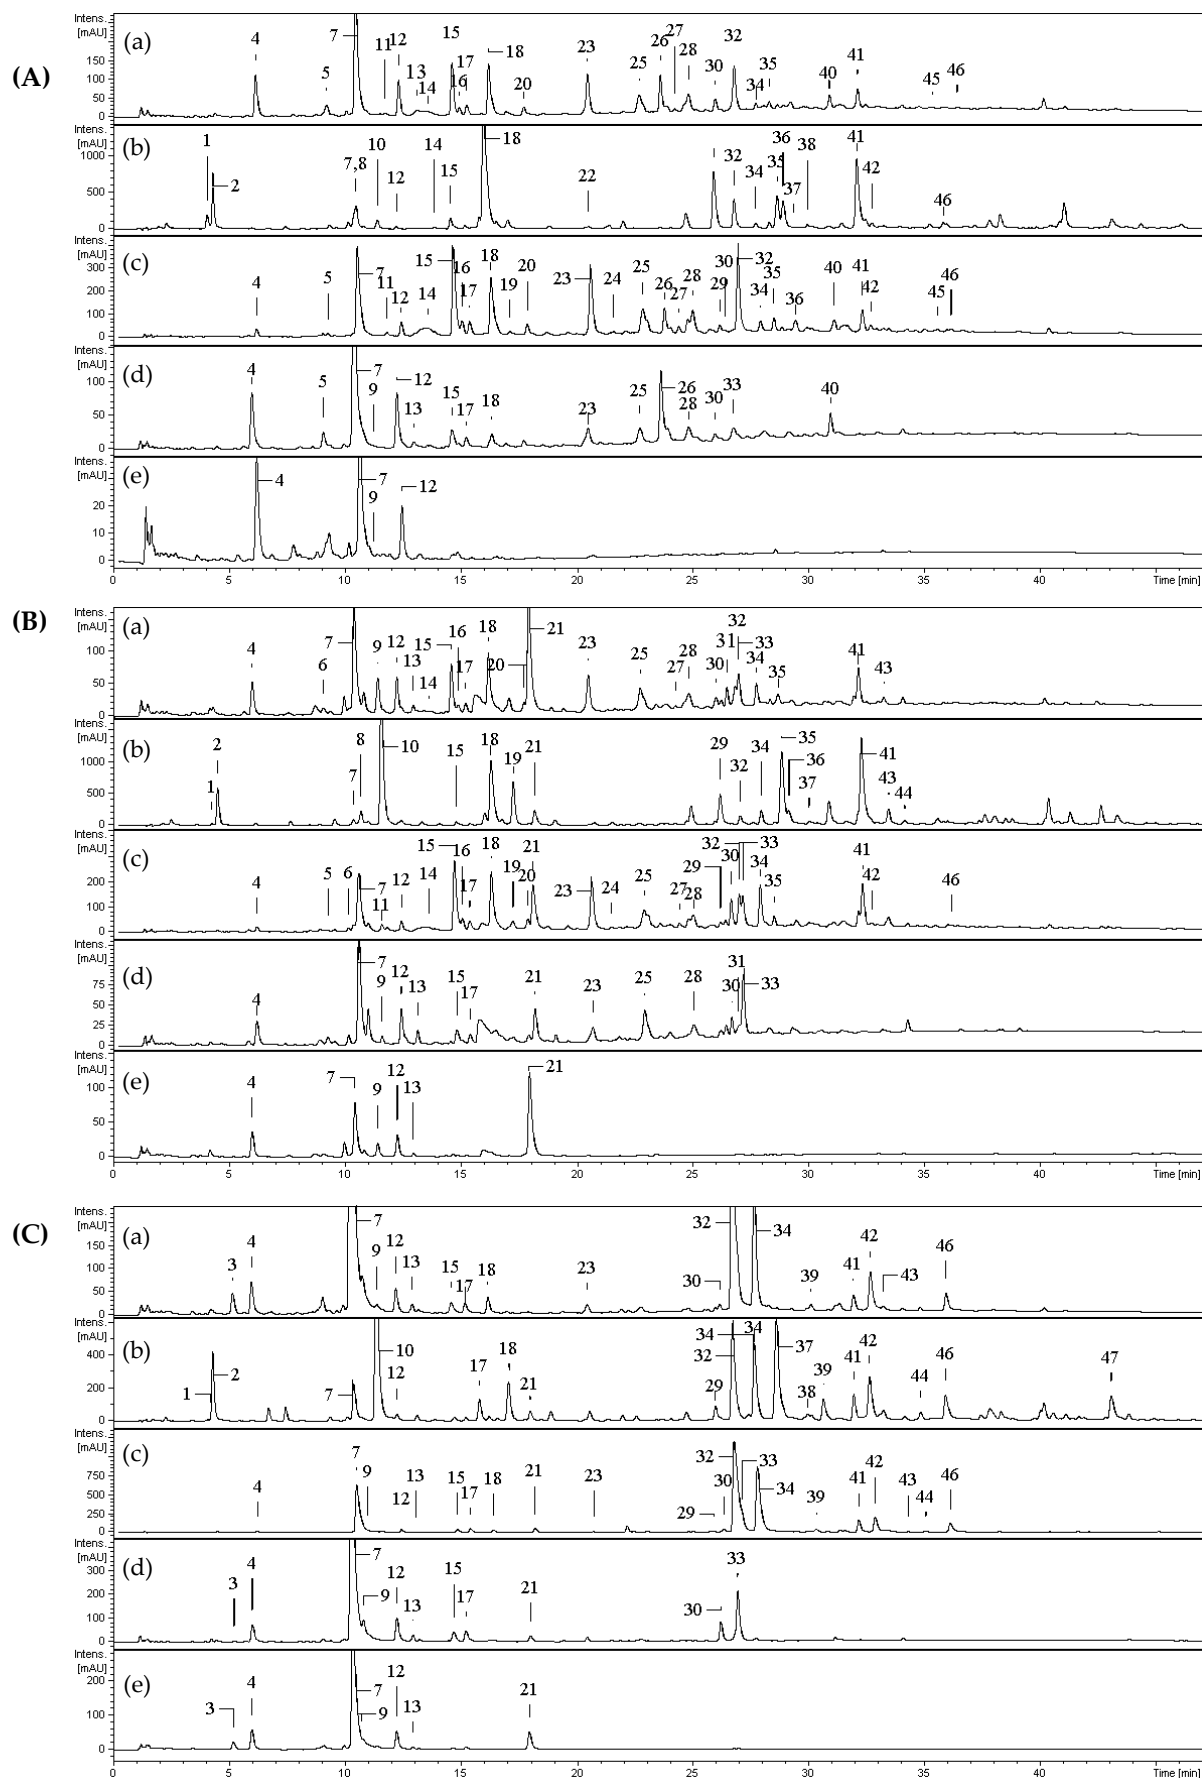

**Figure S1.** The UHPLC-UV chromatograms of the leaf extracts of *C. bullatus* (A), *C. zabelii* (B) and *C. integerrimus* (C) at 280 nm. Extracts: (a) MED, defatted methanol-water (7:3, v/v) extract; (B) DEF, diethyl-ether fraction; (c) EAF, ethyl acetate fraction; (d) BF, *n*-butanol fraction; (e) WR, water residue.

**Table S1.** UHPLC-PDA-ESI-MS<sup>3</sup> data of polyphenols identified in the fractionated dry extracts of *Cotoneaster* leaves.

| Peak | Analyte                                                                | R <sub>t</sub> <sup>c</sup><br>(min) | UV λ <sub>max</sub> <sup>d</sup><br>(nm) | Formula                                         | [M-H] <sup>-e</sup><br>(m/z) | Fragmentary ions<br>(% relative abundance)                                                                | Extracts <sup>f</sup> |         |         |         |         |
|------|------------------------------------------------------------------------|--------------------------------------|------------------------------------------|-------------------------------------------------|------------------------------|-----------------------------------------------------------------------------------------------------------|-----------------------|---------|---------|---------|---------|
|      |                                                                        |                                      |                                          |                                                 |                              |                                                                                                           | MED                   | DEF     | EAF     | BF      | WR      |
| 1    | protocatechuic acid <sup>a,b</sup>                                     | 4.4                                  | 260, 293                                 | C <sub>7</sub> H <sub>6</sub> O <sub>4</sub>    | 153                          | MS <sup>2</sup> : 153(100)                                                                                |                       | B, Z, I |         |         |         |
| 2    | <i>p</i> -hydroxybenzoic acid <sup>a,b</sup>                           | 4.7                                  | 254                                      | C <sub>7</sub> H <sub>6</sub> O <sub>3</sub>    | 137                          | MS <sup>2</sup> : 93(40)                                                                                  |                       | B, Z, I |         |         |         |
| 3    | caffeoylquinic acid hexoside <sup>b</sup>                              | 5.4                                  | 325                                      | C <sub>25</sub> H <sub>24</sub> O <sub>12</sub> | 515                          | MS <sup>2</sup> : 379(69), 353(29), 341 (20), 191(23)<br>MS <sup>3</sup> [353]: 191(84)                   | I                     |         |         | I       | I       |
| 4    | 3- <i>O</i> -caffeoylquinic acid (neochlorogenic acid) <sup>a</sup>    | 6.1                                  | 325                                      | C <sub>16</sub> H <sub>18</sub> O <sub>9</sub>  | 353                          | MS <sup>2</sup> : 191(100), 179(40), 135(5)                                                               | B, Z, I               |         | B, Z, I | B, Z, I | B, Z, I |
| 5    | procyanidin dimer B-type <sup>b</sup>                                  | 9.0                                  | 280                                      | C <sub>30</sub> H <sub>26</sub> O <sub>12</sub> | 577                          | MS <sup>2</sup> : 451(33), 425(100), 407(65), 289(26)<br>MS <sup>3</sup> [425]: 407(88), 273(10)          | B                     |         | B, Z    | B       |         |
| 6    | caffeic acid derivative <sup>b</sup>                                   | 9.7                                  | 325                                      |                                                 | 451                          | MS <sup>2</sup> : 405 (100), 179 (7)                                                                      | Z                     |         | Z       |         |         |
| 7    | 5- <i>O</i> -caffeoylquinic acid (chlorogenic acid) <sup>a</sup>       | 10.4                                 | 325                                      | C <sub>16</sub> H <sub>18</sub> O <sub>9</sub>  | 353                          | MS <sup>2</sup> : 191(96), 179(3)                                                                         | B, Z, I               | B, Z, I | B, Z, I | B, Z, I | B, Z, I |
| 8    | (+)-catechin <sup>a</sup>                                              | 10.4                                 | 280                                      | C <sub>15</sub> H <sub>14</sub> O <sub>6</sub>  | 289                          | MS <sup>2</sup> : 245 (100), 205 (41)                                                                     |                       | B, Z    |         |         |         |
| 9    | dicafeoylquinic acid isomer <sup>b</sup>                               | 11.1                                 | 325                                      | C <sub>25</sub> H <sub>24</sub> O <sub>12</sub> | 515                          | MS <sup>2</sup> : 395(22), 379(100), 285(8)                                                               | Z, I                  |         | I       | B, Z, I | B, Z, I |
| 10   | caffeic acid <sup>a,b</sup>                                            | 11.6                                 | 325                                      | C <sub>9</sub> H <sub>8</sub> O <sub>4</sub>    | 179                          | MS <sup>2</sup> : 135(87)                                                                                 |                       | B, Z, I |         |         |         |
| 11   | procyanidin dimer B-type <sup>b</sup>                                  | 11.7                                 | 280                                      | C <sub>30</sub> H <sub>26</sub> O <sub>12</sub> | 577                          | MS <sup>2</sup> : 451(17), 425(100), 407 (64), 289(15)<br>MS <sup>3</sup> [425]: 407(100), 273(11)        | B                     |         | B, Z    |         |         |
| 12   | 4- <i>O</i> -caffeoylquinic acid <sup>a</sup> (cryptochlorogenic acid) | 12.3                                 | 325                                      | C <sub>16</sub> H <sub>18</sub> O <sub>9</sub>  | 353                          | MS <sup>2</sup> : 191(28), 179(61), 173 (100)                                                             | B, Z, I               | B, I    | B, Z, I | B, Z, I | B, Z, I |
| 13   | dicafeoylquinic acid isomer <sup>b</sup>                               | 12.8                                 | 325                                      | C <sub>25</sub> H <sub>24</sub> O <sub>12</sub> | 515                          | MS <sup>2</sup> : 395(16), 379(100), 285(67)                                                              | B, Z, I               |         | I       | B, Z, I | Z, I    |
| 14   | procyanidin dimer B-type <sup>b</sup>                                  | 13.5                                 | 280                                      | C <sub>30</sub> H <sub>26</sub> O <sub>12</sub> | 577                          | MS <sup>2</sup> : 451(44), 425(100), 407(64), 289(15)<br>MS <sup>3</sup> [425]: 407(100), 273(6)          | B, Z                  | B       | B, Z    |         |         |
| 15   | procyanidin B2 <sup>a</sup>                                            | 14.6                                 | 280                                      | C <sub>30</sub> H <sub>26</sub> O <sub>12</sub> | 577                          | MS <sup>2</sup> : 451(27), 425(100), 407(41), 289(8)<br>MS <sup>3</sup> [425]: 407(100), 273(4)           | B, Z, I               | B, Z    | B, Z, I | B, Z, I |         |
| 16   | procyanidin trimer B-type                                              | 15.0                                 | 280                                      | C <sub>45</sub> H <sub>38</sub> O <sub>18</sub> | 865                          | MS <sup>2</sup> : 739(93), 713(58), 695(87), 577(20)<br>MS <sup>3</sup> [713]: 695(76), 425(73), 407(100) | B, Z                  |         | B, Z    |         |         |
| 17   | 5- <i>p</i> -coumaroylquinic acid                                      | 15.3                                 | 310                                      | C <sub>16</sub> H <sub>18</sub> O <sub>8</sub>  | 337                          | MS <sup>2</sup> : 191(100), 163(5)                                                                        | B, Z, I               | I       | B, Z, I | B, Z, I |         |
| 18   | (-)-epicatechin <sup>a</sup>                                           | 16.1                                 | 280                                      | C <sub>15</sub> H <sub>14</sub> O <sub>6</sub>  | 289                          | MS <sup>2</sup> : 245(100), 205(22), 179(13), 137(5)                                                      | B, Z, I               | B, Z, I | B, Z, I | B       |         |
| 19   | procyanidin dimer B-type <sup>b</sup>                                  | 17.2                                 | 280                                      | C <sub>30</sub> H <sub>26</sub> O <sub>12</sub> | 577                          | MS <sup>2</sup> : 451(15), 425(100), 407(19), 289(24)                                                     |                       | Z       | B, Z    |         |         |
| 20   | procyanidin tetramer B-type <sup>b</sup>                               | 17.7                                 | 280                                      | C <sub>60</sub> H <sub>50</sub> O <sub>24</sub> | 1153                         | MS <sup>2</sup> : 1027(47), 863(72), 739(14), 501(60), 491(81), 289(100)                                  | B, Z                  |         | B, Z    |         |         |
| 21   | caffeic acid derivative                                                | 18.2                                 | 290, 328                                 |                                                 | 613                          | MS <sup>2</sup> : 457(6), 339(14), 295(100), 179(16)                                                      | Z                     | Z, I    | Z, I    | Z, I    | Z, I    |
| 22   | procyanidin dimer B-type <sup>b</sup>                                  | 20.3                                 | 280                                      | C <sub>30</sub> H <sub>26</sub> O <sub>12</sub> | 577                          | MS <sup>2</sup> : 451(17), 425(100), 407(59), 289(20)<br>MS <sup>3</sup> [425]: 407(100), 273(12)         |                       | B       |         |         |         |
| 23   | procyanidin C1 <sup>a</sup>                                            | 20.4                                 | 280                                      | C <sub>45</sub> H <sub>38</sub> O <sub>18</sub> | 865                          | MS <sup>2</sup> : 713(51), 695(100), 577(26)<br>MS <sup>3</sup> [713]: 695(100), 425(32), 407(36)         | B, Z, I               |         | B, Z, I | B, Z    |         |

|    |                                                                    |      |          |                                                 |      |                                                                                                           |         |         |         |         |
|----|--------------------------------------------------------------------|------|----------|-------------------------------------------------|------|-----------------------------------------------------------------------------------------------------------|---------|---------|---------|---------|
| 24 | procyanidin dimer B-type <sup>b</sup>                              | 21.4 | 280      | C <sub>30</sub> H <sub>26</sub> O <sub>12</sub> | 577  | MS <sup>2</sup> : 425(91), 407(72), 289(100)<br>MS <sup>3</sup> [425]: 407(100), 273(4)                   |         |         | B, Z    |         |
| 25 | procyanidin tetramer B-type                                        | 22.9 | 280      | C <sub>60</sub> H <sub>50</sub> O <sub>24</sub> | 1153 | MS <sup>2</sup> : 1027(25), 863(69), 739(3), 501(51), 491(39), 289(100)                                   | B, Z    |         | B, Z    | B, Z    |
| 26 | quercetin 3-O-β-(2''-O-β-xylosyl)galactoside <sup>a</sup>          | 23.6 | 268, 355 | C <sub>26</sub> H <sub>28</sub> O <sub>16</sub> | 595  | MS <sup>2</sup> : 463(9), 445(15), 301(100)                                                               | B       |         | B       | B       |
| 27 | procyanidin tetramer B-type                                        | 24.3 | 280      | C <sub>60</sub> H <sub>50</sub> O <sub>24</sub> | 1153 | MS <sup>2</sup> : 1027(17), 863(94), 739(14), 501(100), 491(71), 289(97)                                  | B, Z    |         | B, Z    |         |
| 28 | procyanidin dimer hexoside                                         | 24.9 | 280      | C <sub>36</sub> H <sub>36</sub> O <sub>17</sub> | 739  | MS <sup>2</sup> : 587(100), 577 (12), 451(18), 289(32)                                                    | B, Z    |         | B, Z    | B, Z    |
| 29 | unidentified compound                                              | 26.1 | 280      |                                                 | 451  | MS <sup>2</sup> : 341 (100), 217 (4)                                                                      |         | B, Z, I | B, I    |         |
| 30 | quercetin rhamnoside-hexoside                                      | 26.4 | 255, 355 | C <sub>27</sub> H <sub>30</sub> O <sub>16</sub> | 609  | MS <sup>2</sup> : 447(7), 343(12), 301(100)<br>MS <sup>3</sup> [447]: 301(100)                            | B, Z, I |         | B, Z, I | B, Z, I |
| 31 | quercetin dirhamnoside                                             | 26.6 | 255, 350 | C <sub>27</sub> H <sub>30</sub> O <sub>15</sub> | 593  | MS <sup>2</sup> : 447(100), 301(45)<br>MS <sup>3</sup> [447]: 301(100)                                    |         |         | Z       | Z       |
| 32 | hyperoside<br>(quercetin 3-O-β-galactoside) <sup>a</sup>           | 26.9 | 255, 353 | C <sub>21</sub> H <sub>20</sub> O <sub>12</sub> | 463  | MS <sup>2</sup> : 301(100)                                                                                | B, Z, I | B, Z, I | B, Z, I |         |
| 33 | rutin (quercetin 3-O-β-(6''-O-α-rhamnosyl)-glucoside) <sup>a</sup> | 27.3 | 265, 350 | C <sub>27</sub> H <sub>30</sub> O <sub>16</sub> | 609  | MS <sup>2</sup> : 463(1), 343(6), 301(100)                                                                | Z       |         | Z, I    | B, Z, I |
| 34 | isoquercitrin<br>(quercetin-O-β-glucoside) <sup>a</sup>            | 27.9 | 275, 350 | C <sub>21</sub> H <sub>20</sub> O <sub>12</sub> | 463  | MS <sup>2</sup> : 301(100)                                                                                | B, Z, I | B, Z, I | B, Z, I |         |
| 35 | procyanidin dimer B-type                                           | 28.5 | 280      | C <sub>30</sub> H <sub>26</sub> O <sub>12</sub> | 577  | MS <sup>2</sup> : 425(100), 407(51), 289(16)                                                              | B, Z    | B, Z    | B, Z    |         |
| 36 | proanthocyanidin derivative <sup>b</sup>                           | 28.8 | 280      |                                                 | 483  | MS <sup>2</sup> : 451(61), 341(42), 289(100), 245(4)                                                      |         | B, Z    | B       |         |
| 37 | unidentified compound                                              | 29.0 | 280      |                                                 | 451  | MS <sup>2</sup> : 341(91), 299(100), 189(22), 177(23)                                                     |         | B, Z, I |         |         |
| 38 | quercetin pentoside <sup>b</sup>                                   | 30.2 | 275, 350 | C <sub>20</sub> H <sub>18</sub> O <sub>11</sub> | 433  | MS <sup>2</sup> : 301(100), 179(4)                                                                        |         | B, I    |         |         |
| 39 | kaempferol hexoside <sup>b</sup>                                   | 30.5 | 265, 350 | C <sub>21</sub> H <sub>20</sub> O <sub>11</sub> | 447  | MS <sup>2</sup> : 285(100)                                                                                | I       | I       | I       |         |
| 40 | quercetin rhamnoside-hexoside                                      | 31.0 | 265, 355 | C <sub>27</sub> H <sub>30</sub> O <sub>16</sub> | 609  | MS <sup>2</sup> : 447(9), 301(100)                                                                        | B       |         | B       | B       |
| 41 | quercitrin<br>(quercetin 3-O-β-rhamnoside) <sup>a</sup>            | 32.2 | 275, 350 | C <sub>21</sub> H <sub>20</sub> O <sub>11</sub> | 447  | MS <sup>2</sup> : 301(100)                                                                                | B, Z, I | B, Z, I | B, Z, I |         |
| 42 | 3,5-O-dicaffeoylquinic acid <sup>b</sup>                           | 32.9 | 325      | C <sub>25</sub> H <sub>24</sub> O <sub>12</sub> | 515  | MS <sup>2</sup> : 447(19), 379(57), 353(100)<br>MS <sup>3</sup> [353]: 191(100), 179(35)                  | I       | B, I    | B, Z, I |         |
| 43 | quercetin hexoside derivative                                      | 33.3 | 265, 355 | C <sub>23</sub> H <sub>22</sub> O <sub>13</sub> | 505  | MS <sup>2</sup> : 463(24), 337(26), 301(100)                                                              | Z, I    | Z       | I       |         |
| 44 | quercetin hexoside derivative                                      | 34.7 | 265, 355 | C <sub>23</sub> H <sub>22</sub> O <sub>13</sub> | 505  | MS <sup>2</sup> : 463(31), 373(4), 301(100)                                                               |         | Z, I    | I       |         |
| 45 | quercetin dirhamnoside <sup>b</sup>                                | 35.3 | 365, 355 | C <sub>27</sub> H <sub>30</sub> O <sub>15</sub> | 593  | MS <sup>2</sup> : 447(11), 301(100)                                                                       | B       |         | B       |         |
| 46 | 4,5-O-dicaffeoylquinic acid isomer <sup>b</sup>                    | 36.3 | 325      | C <sub>25</sub> H <sub>24</sub> O <sub>12</sub> | 515  | MS <sup>2</sup> : 379(90), 353(100), 299(8), 203(14)<br>MS <sup>3</sup> [353]: 191(37), 179(69), 173(100) | I, B    | B, I    | B, Z, I |         |
| 47 | quercetin <sup>a, b</sup>                                          | 43.2 | 256, 365 | C <sub>15</sub> H <sub>10</sub> O <sub>7</sub>  | 301  | MS <sup>2</sup> : 273(11), 179(100), 151(66), 107(5)                                                      |         | Z, I    |         |         |

<sup>a</sup> Analytes identified with authentic standards. <sup>b</sup> Compounds identified in the *Cotoneaster* extracts for the first time. <sup>c</sup> R<sub>t</sub>, retention time. <sup>d</sup> UV<sub>max</sub>, absorbance maxima in PDA spectra. <sup>e</sup> [M-H]<sup>-</sup>; pseudomolecular ion in MS spectra recorded in a negative mode. <sup>f</sup> MED, methanol-water (7:3, v/v) extract; DEF, diethyl-ether fraction; EAF, ethyl acetate fraction; BF, *n*-butanol fraction; WR, water residue; **B**, *C. bullatus*; **Z**, *C. zabelii* and **I**, *C. integerrimus*.

**Table S2.** Correlation coefficients (*r*) of the linear relationships between antioxidant activity parameters and the content of particular groups of phenolics in the investigated *Cotoneaster* extracts.

| Group of phenolics | Chemical model      |                     | Human plasma model |                   |                          |                       | Enzyme inhibition              |         |                   |
|--------------------|---------------------|---------------------|--------------------|-------------------|--------------------------|-----------------------|--------------------------------|---------|-------------------|
|                    | DPPH<br>(mmol TX/g) | FRAP<br>(mmol TX/g) | 3NT<br>(nmol/mg)   | LOOH<br>(nmol/mg) | TBARS<br>( $\mu$ mol/mL) | DPPH<br>( $\mu$ M TX) | FRAP<br>(mM Fe <sup>2+</sup> ) | HYAL    | LOX               |
| TPC (mg GAE/g dw)  | <b>0.9706***</b>    | <b>0.9622***</b>    | -0.6541            | 0.0948            | -0.6154                  | <b>0.7823*</b>        | 0.6009                         | -0.4228 | <b>-0.8403***</b> |
| TFC (mg/g dw)      | 0.2386              | 0.4378              | -0.0211            | -0.1395           | 0.5604                   | 0.2394                | 0.2103                         | 0.3407  | -0.3416           |
| TAC (mg/g dw)      | 0.0012              | 0.2457              | 0.4858             | -0.1351           | 0.6621                   | -0.2518               | -0.1496                        | 0.1116  | -0.2599           |
| TPA (mg CYE/g dw)  | 0.5088              | 0.1160              | 0.2312             | <b>0.7432*</b>    | -0.1747                  | -0.2562               | -0.2919                        | -0.4071 | -0.4707           |
| TLPA (mg/g dw)     | <b>0.6645**</b>     | <b>0.7240**</b>     | <b>-0.8784**</b>   | -0.3891           | <b>-0.8675**</b>         | <b>0.7263*</b>        | 0.6080                         | -0.2326 | -0.3326           |

Activity and quantitative parameters according to Tables 1, 2 and Figures 2, 3. Asterisks mean statistical significance of the estimated linear relationships (\* $p < 0.05$ , \*\* $p < 0.01$ , \*\*\* $p < 0.001$ ).

**Table S3.** Statistically significant multiple regression models for activity parameters based on the content of particular groups of phenolics in the *Cotoneaster* extracts.

| Activity parameter                 | Statistically significant coefficients ( <i>p</i> ) |                 |                 |                  |                   | Parameters of the model |         |         |
|------------------------------------|-----------------------------------------------------|-----------------|-----------------|------------------|-------------------|-------------------------|---------|---------|
|                                    | Y-intercept                                         | TFC             | TAC             | TPA              | TLPA              | adj. R <sup>2</sup>     | F-value | p-value |
| DPPH (mmol TX/g) <sup>a</sup>      | -                                                   | 0.0055 (0.0290) | 0.0114 (0.0187) | 0.0092 (0.0000)  | 0.0136 (0.0000)   | 0.9683                  | 115.75  | 0.0000  |
| FRAP (mmol TX/g) <sup>a</sup>      | -                                                   | 0.0073 (0.0329) | 0.0228 (0.0019) | 0.0068 (0.0005)  | 0.0185 (0.0000)   | 0.9591                  | 89.09   | 0.0000  |
| LOX (nmol/mL) <sup>a</sup>         | 608.9 (0.0000)                                      | -               | -2.705 (0.0058) | -0.9297 (0.0026) | -0.8006 (0.0301)  | 0.5806                  | 7.46    | 0.0053  |
| DPPH ( $\mu$ M TX) <sup>b</sup>    | 0.4536 (0.0000)                                     | -               | -               | -                | 0.0002 (0.0267)   | 0.4601                  | 7.817   | 0.0267  |
| TBARS ( $\mu$ mol/mL) <sup>b</sup> | 0.0442 (0.0000)                                     | -               | -               | -                | -0.00002 (0.0024) | 0.7172                  | 21.29   | 0.0024  |
| 3-NT (nmol/mg) <sup>b</sup>        | 2.3414 (0.0000)                                     | -               | -               | -                | -0.0023 (0.0018)  | 0.7390                  | 23.66   | 0.0018  |
| LOOH (nmol/mg) <sup>b</sup>        | 0.6243 (0.0008)                                     | -               | -               | 0.0013 (0.0217)  | -                 | 0.4884                  | 8.64    | 0.0217  |

Activity and quantitative parameters according to Tables 1, 2 and Figures 2, 3; the activity parameters from <sup>a</sup> the chemical and <sup>b</sup> the human plasma tests; adj. R<sup>2</sup>, R<sup>2</sup> adjusted for number of predictors in the model; F-value, F-test for overall significance
